# Supplementary material for: Exploration of nanoporous graphene membranes for the separation of N2 from CO2: a multi-scale computational study
Source: Royal Society of Chemistry journal article supplement (doi:10.1039/c5cp06569k), 2015-12-08
Supplement: c5cp06569k1.pdf [file c5cp06569k1.pdf]

## **Supplementary Information:**

### **Exploration of functionalized graphene membranes for selective separating CO<sub>2</sub>/N<sub>2</sub>: a multi-scale computational study**

*Yong Wang,<sup>a</sup> Qingyuan Yang,<sup>b</sup> Jinping Li,<sup>\*a</sup> Jiangfeng Yang,<sup>\*a</sup> and Chongli Zhong<sup>b</sup>*

*<sup>a</sup> Research Institute of Special Chemicals, Taiyuan University of Technology, Taiyuan  
030024, Shanxi, China.*

*<sup>b</sup> State Key Laboratory of Organic-Inorganic Composites, Beijing University of  
Chemical Technology, Beijing 100029, China.*

\*Corresponding authors:

E-mail: jpli211@hotmail.com, yangjiangfeng@tyut.edu.cn.

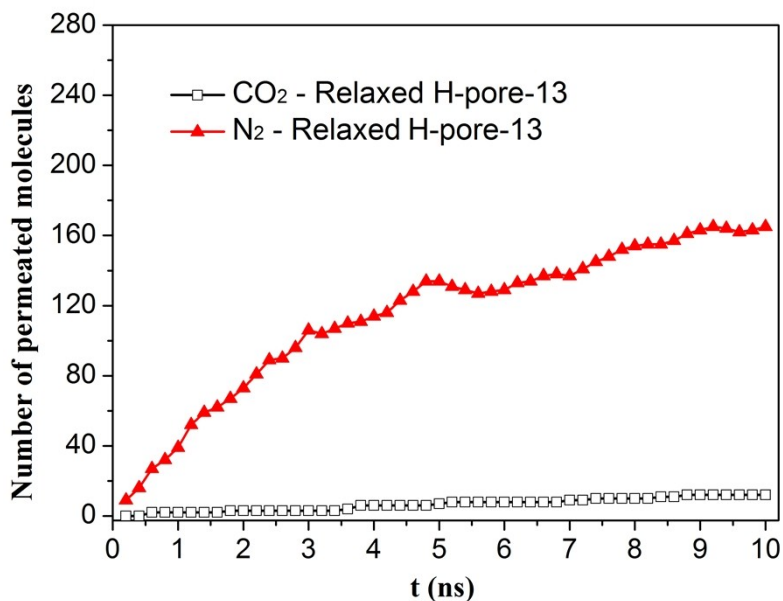

**Fig. S1** The number profiles of permeated molecules for equimolar N<sub>2</sub>/CO<sub>2</sub> mixture through the relaxed H-pore-13 graphene membranes at 298K, as a function of simulation time.

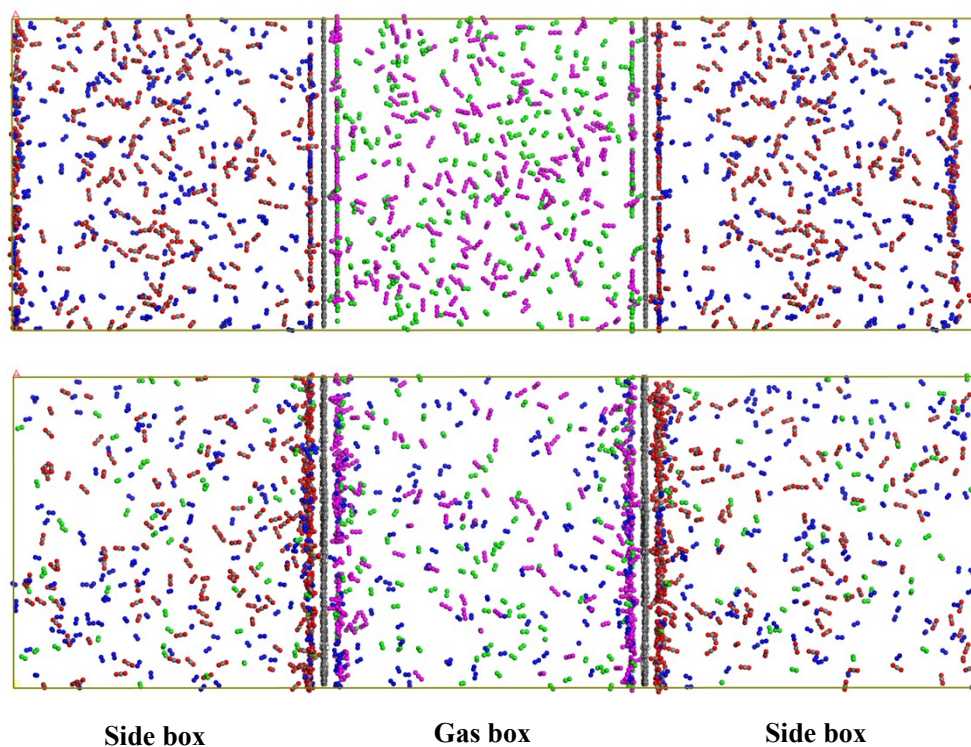

**Fig. S2** Snapshots of the equimolar N<sub>2</sub>/CO<sub>2</sub> mixture permeating through the relaxed H-pore-13 graphene membranes (a) before and (b) after a MD simulations time of 10 ns (C, gray or pink; N, blue or green; O, red or pink; H, white).

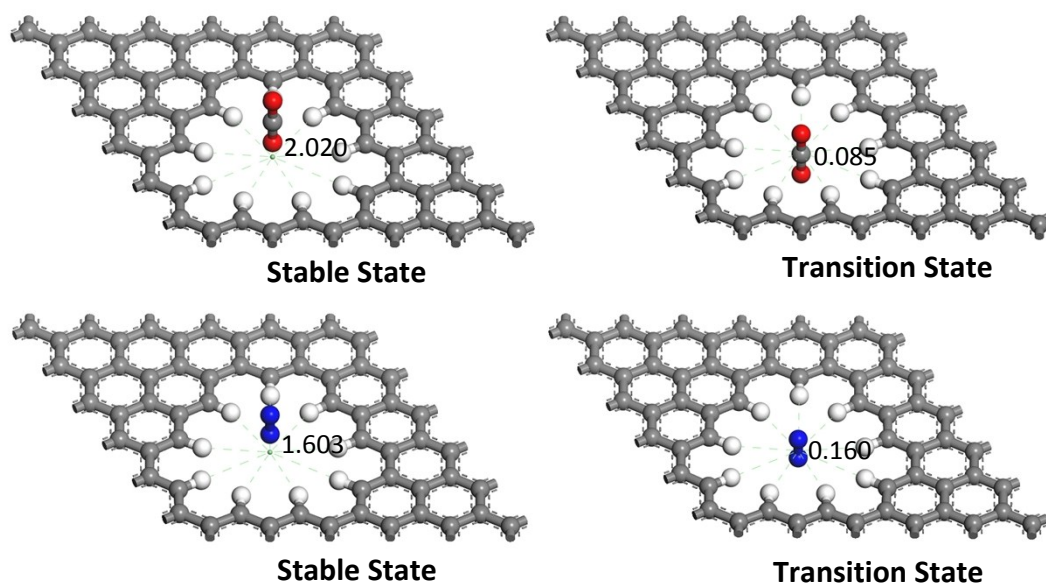

**Fig. S3** The stable state and transition state for the CO<sub>2</sub> and N<sub>2</sub> gases passing through H-pore-13. (C, gray; N, blue, O, red; H, white).
